# Supplementary material
Source: Springer Nature journal article supplement (https://www.springermedizin.de/resource/supplementary/13012_2010_332_MOESM1_ESM.pdf/9629796)
Supplement: MOESM1 [file 9629796]

**EVIDENCE -**  
research, clinical &  
patient experience,  
local data

**CONTEXT -**  
culture,  
leadership,  
evaluation

**FACILITATION -**  
purpose, role,  
skills &  
attributes
